# Supplementary material for: Prioritising attributes for tuberculosis preventive treatment regimens: a modelling analysis
Source: PubMed Central journal article supplement (PMC9115962; doi:10.1186/s12916-022-02378-1), 2022-05-18
Supplement: 12916_2022_2378_MOESM4_ESM.pdf [file 12916_2022_2378_MOESM4_ESM.pdf]

**table S4.** In practice we computed the logarithm of  $\pi(\theta)$ , thus taking the sum of the logarithms of each of the probability densities involved.

With  $\pi(\theta)$  thus defined, we sampled the posterior density using a Markov Chain Monte Carlo approach. In brief, this approach implements a random walk through the space of parameter values  $\theta$  to obtain an unbiased sample of the posterior density. We implemented the ‘adaptive’ MCMC algorithm first introduced by *Haario et al*[32], which incorporates a dynamic covariance matrix to adjust endogenously the scale of ‘jumps’ in proposals for each of the parameter values. For the set of parameter values thus obtained, we took every tenth element to reduce autocorrelation, thus yielding an ‘ensemble’ of parameters  $\theta_1, \theta_2, \dots$ ; This ensemble captures simultaneously the uncertainty in the parameter inputs, as well as in the calibration data. Then, to estimate uncertainty in a given simulated output  $I$  (e.g. in the reduction of incidence with a given coverage of intervention), we simulated this output  $I_i$  for every  $\theta_i$ . We finally estimated uncertainty in  $I_i$  by determining its 2.5<sup>th</sup>, 50<sup>th</sup> and 97.5<sup>th</sup> percentiles.

Calibration results

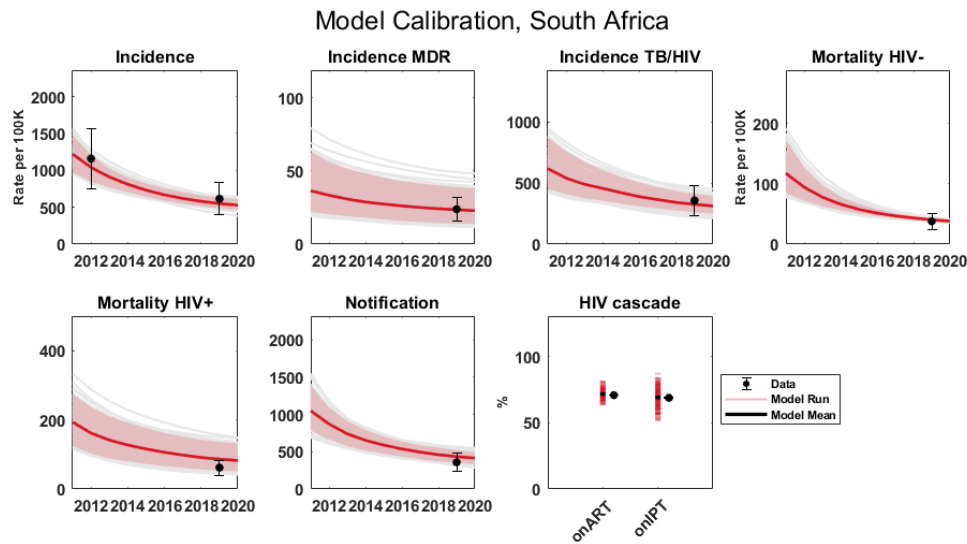

Figure S3 Model calibration results to epidemiological targets in South Africa

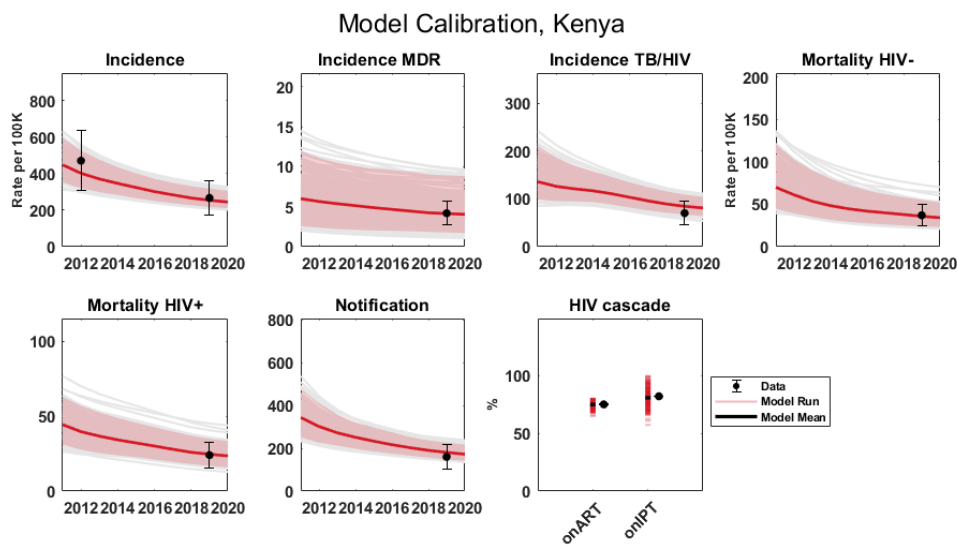

Figure S4 Model calibration results to epidemiological targets in Kenya

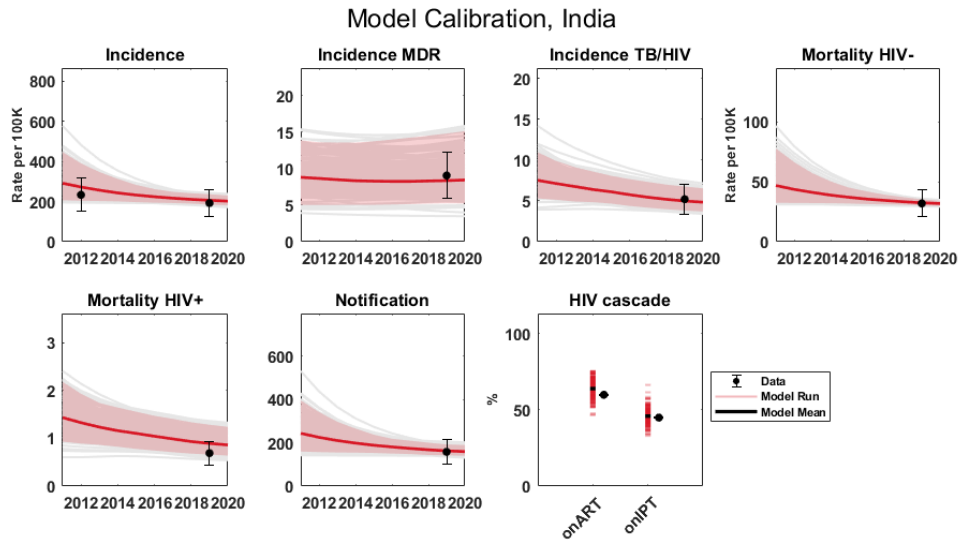

Figure S5 Model calibration results to epidemiological targets in India

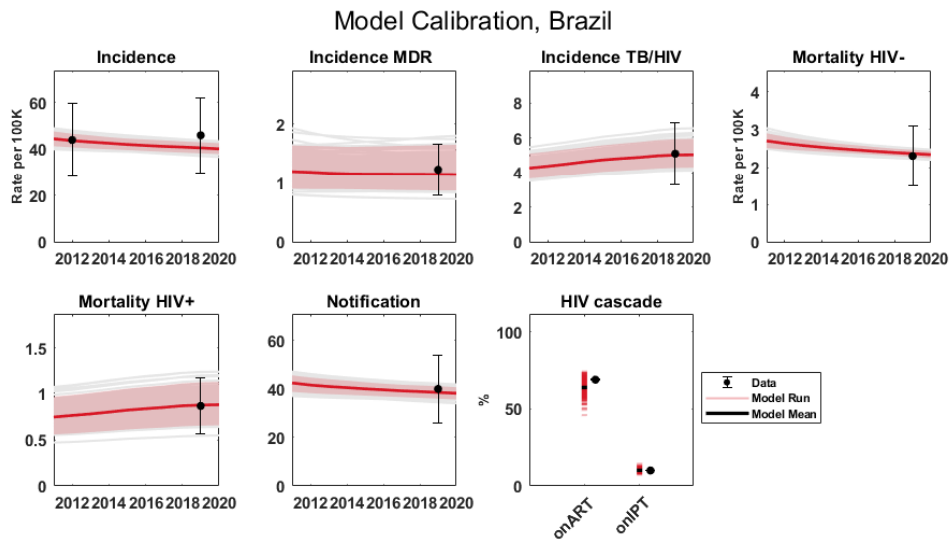

Figure S6 Model calibration results to epidemiological targets in Brazil

### MCMC diagnostics

Convergence was assessed visually by inspecting the trace plots of the calibrated parameters and also through estimation of the Gelman –Rubin [33] convergence diagnostic , computed as follows:

$$\hat{R} = \frac{\hat{V}}{W}, \tag{29}$$

Where  $\hat{V}$  is the posterior variance estimate of the combined chains and  $W$  is the within-chain variance. If the chains have converged to the target posterior distribution, then  $\hat{R}$  (also known as the scale reduction factor) should be close to 1. As a rule of thumb, values below 1.1 are

typically considered to indicate convergence. The full trace of this diagnostic also allows us to establish what should be the size of the burn-in phase.

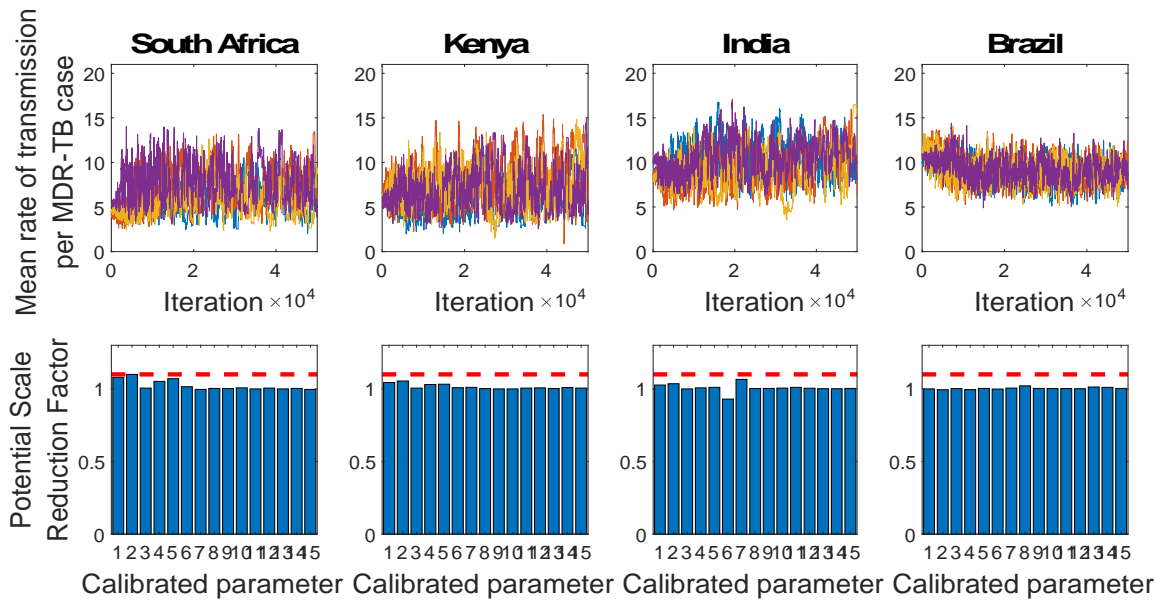

Figure S7 **MCMC diagnostics** In upper row, trace plots for the posterior values of a selected calibrated parameter (Mean rate of transmission of MDR-TB). In lower row, Potential Scale Reduction Factor as a measure of autocorrelation (blue bars) and a threshold (red dashed line) of 1, indicating that burning and thinning of chains removed autocorrelation.
